# Supplementary material
Source: publisher figshare collection journal article supplement (https://acs.figshare.com/ndownloader/files/23313449)
Supplement: Supplementary file 1 [file 23313449]

## Supporting Information

### Solution Processed CIGS Solar Cells with 15.25% Efficiency by Surface Sulfurization

Shengjie Yuan<sup>+</sup>, Xinshou Wang<sup>+</sup>, Yunhai Zhao, Qianqian Chang, Zhen Xu, Jun Kong\*, Sixin Wu\*

Key Lab for Special Functional Materials, Ministry of Education, National & Local Joint Engineering Research Center for High-Efficiency Display and Lighting Technology, School of Materials Science and Engineering, Collaborative Innovation Center of Nano Functional Materials and Applications, Henan University, Kaifeng 475004, China

E-mail: [hdkj@henu.edu.cn](mailto:hdkj@henu.edu.cn); [wusixin@henu.edu.cn](mailto:wusixin@henu.edu.cn)

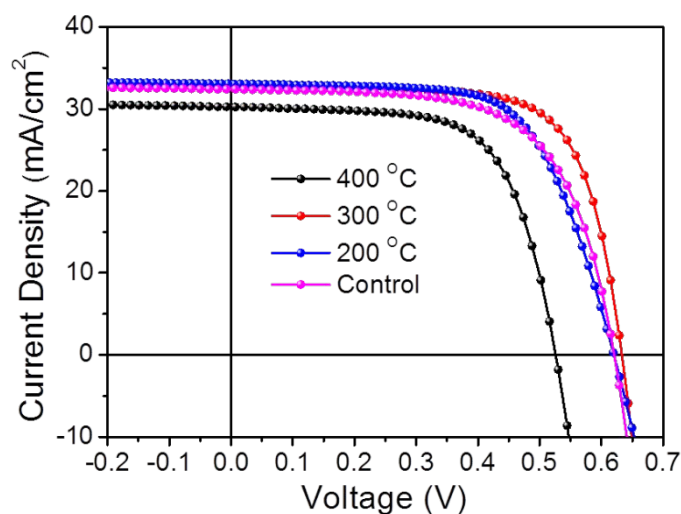

**Figure S1.** J–V curves of TA treated CIGS devices under different temperature.

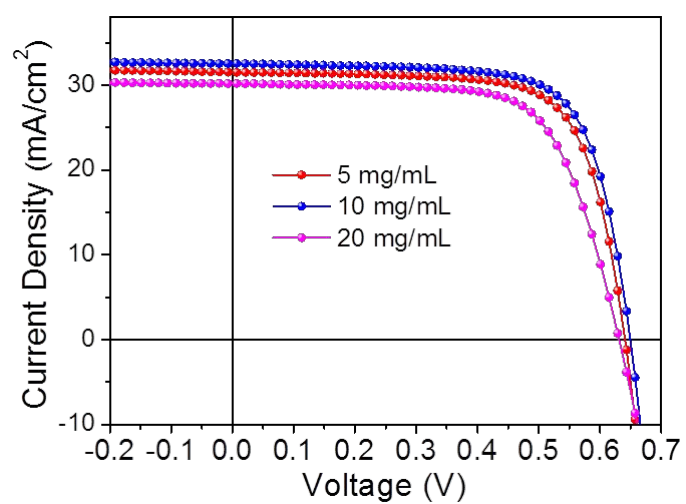

**Figure S2.** J–V curves of treated CIGS devices with different TA concentration.

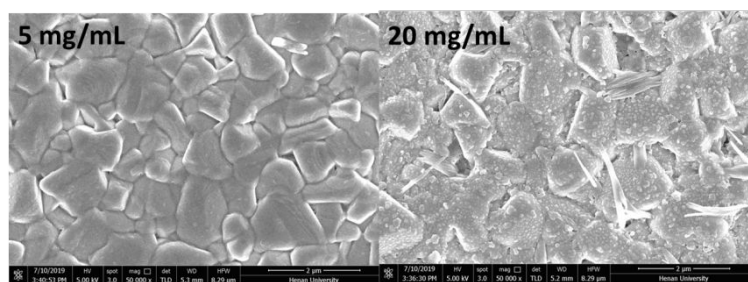

**Figure S3.** The surface SEM images of the TA treated CIGS thin films with different TA concentration.

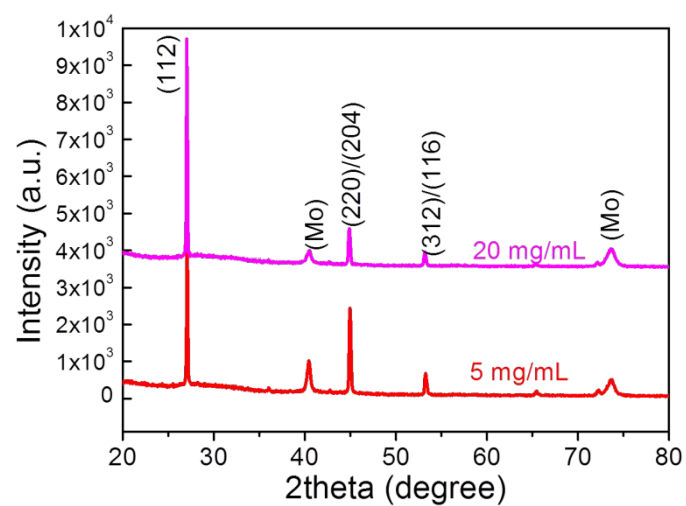

**Figure S4.** The XRD patterns of the TA treated CIGS samples with different TA concentration.

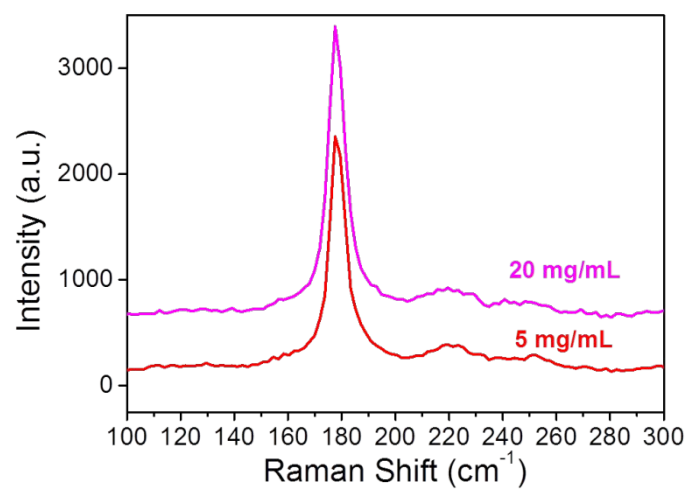

**Figure S5.** The Raman spectra of the TA treated CIGS samples with different TA concentration.

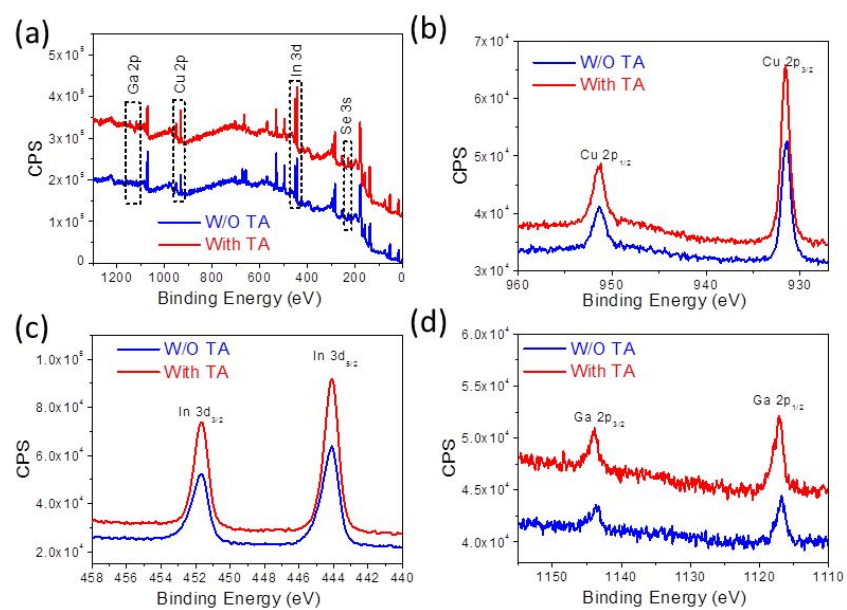

**Figure S6.** XPS of CIGS films (a) Wide-scan XPS spectra. (b) Cu 2p. (c) In 3d. (d) Ga 2p.

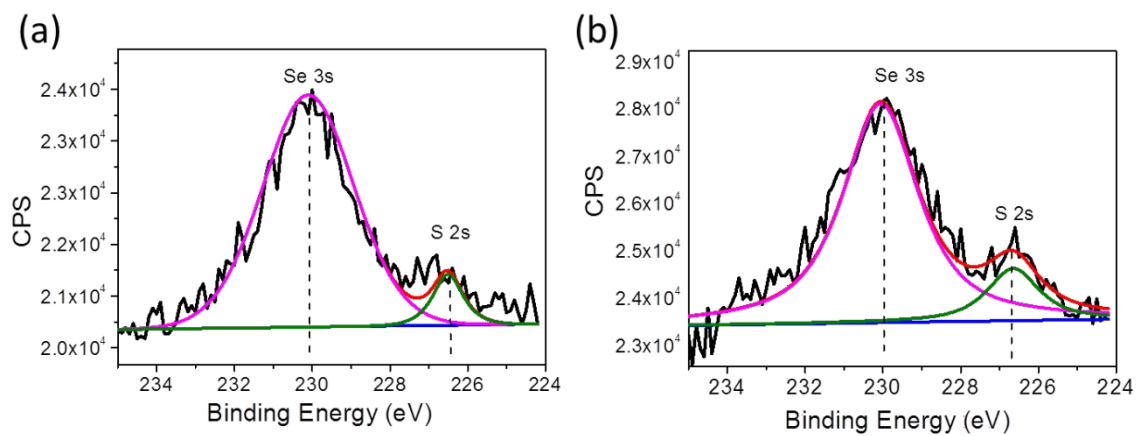

**Figure S7.** XPS of Se 3s and S 2s of the CIGS films treated with different TA concentration

(a) 5mg/mL.(b) 20mg/mL.

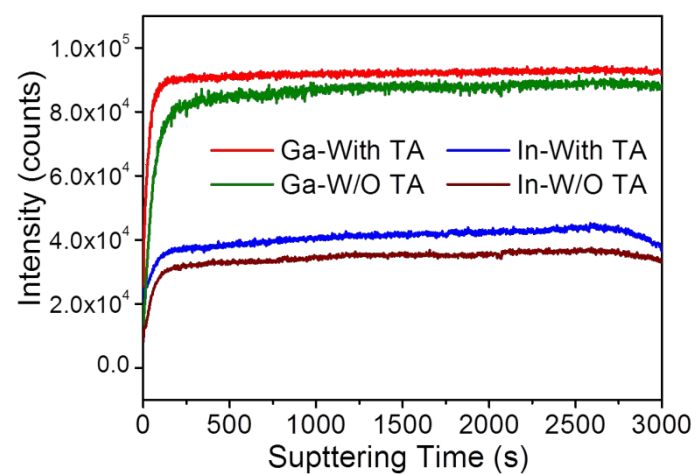

**Figure S8.** Secondary ion mass spectroscopy (SIMS) depth profiles of In and Ga.



**Table S1.** Typical device parameters of CIGS devices under different sulfurization temperature.

| <b>Temperature</b> | <b>PCE</b> | <b>V<sub>oc</sub></b> | <b>J<sub>sc</sub></b>      | <b>FF</b>  |
|--------------------|------------|-----------------------|----------------------------|------------|
| <b>(°C)</b>        | <b>(%)</b> | <b>(V)</b>            | <b>(mA/cm<sup>2</sup>)</b> | <b>(%)</b> |
| control            | 13.14      | 0.602                 | 33.16                      | 65.85      |
| 200                | 13.33      | 0.617                 | 33.05                      | 65.48      |
| 300                | 14.79      | 0.633                 | 32.72                      | 71.39      |
| 400                | 10.54      | 0.525                 | 30.24                      | 66.14      |

**Table S2.** Typical device parameters of CIGS devices under different TA concentration.

| <b>Concentration</b> | <b>PCE</b> | <b>V<sub>oc</sub></b> | <b>J<sub>sc</sub></b>      | <b>FF</b>  |
|----------------------|------------|-----------------------|----------------------------|------------|
| <b>(mg/mL)</b>       | <b>(%)</b> | <b>(V)</b>            | <b>(mA/cm<sup>2</sup>)</b> | <b>(%)</b> |
| 5                    | 14.47      | 0.638                 | 31.51                      | 72.00      |
| 10                   | 15.25      | 0.650                 | 32.53                      | 72.21      |
| 20                   | 13.06      | 0.631                 | 30.16                      | 68.60      |
